# Supplementary material for: The comparison of macroseismic intensity scales
Source: Springer Nature journal article supplement (doi:10.1007/s10950-009-9172-0), 2009-05-29
Supplement: MOESM1 [file 10950_2009_9172_MOESM1_ESM.doc]

# ELECTRONIC SUPPLEMENT TO

# The Comparison of Macroseismic Intensity Scales

*by*

*R.M.W. Musson, G. Grünthal and M. Stucchi*

## Preface

This supplement consists of the actual full text of the most important intensity scales discussed in this paper, for ease of reference. Definitive versions are not always straightforward. The scales presented here are as follows:

Rossi-Forel: As discussed by Davison (1921), the Italian and Swiss versions of this scale differed somewhat. Davison at first referred to his own intensity scale as “Rossi-Forel”, and other variants may also exist. Here, Davison’s translation of the Swiss version (which he describes as the most commonly used) is reproduced.

Mercalli-Cancani-Sieberg: A number of modern versions of this scale can be found, in Italian, on various web pages. The version given here is the original 1912 version, translated by Davison (1921) from Sieberg’s original text. This is fuller than the versions currently circulating, and is of particular historical interest.

Modified Mercalli: As mentioned in the main text of the paper, versions of this scale are legion. The most important is that of Richter (1958), which is the version given here.

Medvedev-Sponheuer-Karník: Although different versions of the MSK scale were published between 1964 and 1981, the differences are fairly inconsequential. The last version is given here.

Japanese Meteorological Agency: The JMA scale of 1996 was published in the form of a table, with intensity degrees down the side and categories of effect along the top. This has been reformatted in a more conventional way for presentation here, and the wording edited slightly to improve the English translation. The scale was further modified in March 2009.

European Macroseismic Scale: Because of the inclusion of graphical elements, this scale is included as a pdf of the original pages that contain the core part of the scale. The full scale is also available as a pdf at <http://tinyurl.com/cp7dc2> in both English and French versions, with Spanish and Chinese versions forthcoming. A short version of the scale is available in English, French, German, Spanish, Czech, Dutch, Greek, Hungarian, Lithuanian, Norwegian and Portuguese.

# THE ROSSI-FOREL (RF) INTENSITY SCALE

## 1884 version, translated by Davison (1921) from Archives des Sciences Physiques et Naturelle, vol 11, pp 148-149.

1 Recorded by a single seismograph, or by some seismographs of the same pattern, but not by several seismographs of different kinds; the shock felt by an experienced observer.

2 Recorded by seismographs of different kinds; felt by a small number of persons at rest.

3 Felt by several persons at rest; strong enough for the duration or direction to be appreciable.

4 Felt by several persons in motion; disturbance of movable objects, doors, windows; creaking of floors.

5 Felt generally by everyone; disturbance of furniture and beds; ringing of some bells.

6 General awakening of those asleep; general ringing of bells; oscillation of chandeliers, stopping of clocks; visible disturbance of trees and shrubs; some startled persons leave their dwellings.

7 Overthrow of movable objects, fall of plaster, ringing of church bells, general panic, without damage to buildings.

8 Fall of chimneys, cracks in the walls of buildings.

9 Partial or total destruction of some buildings.

10 Great disasters, ruins, disturbance of strata, fissures in the earth's crust, rock-falls from mountains.

# THE MERCALLI-CANCANI-SIEBERG (MCS) INTENSITY SCALE

## 1912 version, translated by Davison (1921) from Gerland’s Beiträge zur Geophysik, vol 11, pp 227-239

1 **Imperceptible.** The shock is not felt by man; only the records of seismometers adapted for earthquakes of near origin, or of sensitive seismoscopes give notice of it.

2 **Very slight.** Only a few persons in perfect repose, especially those with sensitive nerves, feel the shock as a slight tremor or rocking. The shock is especially sensible on the upper floors of houses and very rarely on the ground floor. Also, the quiet of the night is favorable to its perception, if the observer is awake.

3 **Slight.** Even in densely populated districts, the shock is felt by only a few persons as a shaking like that produced by the rapid passing ­of a wagon. Occasionally, the duration, and perhaps also the direction, of the movement can be detected. Many only realize afterwards, in talking with others, that there has been an earthquake.

4 **Moderate.** Of persons in the open air, not many feel the earth­quake. Indoors, many persons, but not all, recognize the trembling or slight rocking movement of furniture; glasses and crockery near to­gether gently strike one another as they do when a heavily laden wagon is driven by on an uneven pavement; windows rattle; doors, joists, floors, and ceilings creak; liquids in open vessels are slightly moved. Alarm is hardly ever caused except in the case of persons who have already become nervous and anxious through the experience of other earthquakes. In a few cases, sleepers awake.

5 **Rather strong.** Even during the busiest hours of the day, the earthquake is felt by many persons in the open air. Indoors, the shak­ing of the whole building is generally noticed, the feeling being the same as when some heavy object (such as a sack or piece of furniture) falls in the house; or the observers move, together with chair, bed, etc., as in a ship on an agitated sea. Plants, the branches and weaker boughs of shrubs and trees sway visibly, as they do with a moderate wind. Freely hanging objects, such as curtains and lamps, but not heavy chandeliers, oscillate; small bells ring; the pendulums of clocks are stopped or swing more widely according as the direction of the shock is at right angles or parallel to the plane of oscillation; similarly, stopped pendulum clocks are set going; the striking spring of clocks sounds; electric lights fail to act when contact of the conducting wire is made; pictures rattle against the walls or are displaced; small quantities of liquid are spilt out of well‑filled open vessels; ornaments, small stand­ing frames fall and also objects leaning against the wall; even light furniture may be somewhat shifted from its place, rattling of furniture; doors and window‑shutters open or shut; window‑panes crack. Sleep­ers as a rule are awakened. A few persons run into the open air.

6 **Strong.** The earthquake is felt by everyone with alarm, so that very many persons run into the open air, many thinking that they must fall. Liquids move violently, pictures fall from the walls, books, etc., from shelves, unless the direction of the shock is parallel to that of the walls; numerous vessels are broken; a few pieces of stable furniture are shifted or overturned; church bells and church clocks strike. In a few solidly built mid‑European houses there are cracks in the plaster, which is detached here and there in fragments from the roof and walls. In poorly built houses, the damage is greater, but still not of a serious nature.

7 **Very strong.** Considerable damage is done to furniture through the upsetting or breaking even of heavy pieces. Even large church bells strike. The surfaces of rivers, ponds, and lakes are disturbed, and the mud at the bottom stirred up. A few slips of sandy and gravelly coasts. The level of water in wells is changed. Notwithstanding their solid construction, many mid‑European houses suffer moderate dam­age; there are slight fractures in walls, large pieces of plaster crumble down, tiles fall, pantiles are loosened and slip down. Chimneys are damaged by cracks and by the falling of weather moulding and stones; chimneys in bad condition break off at the roof and injure it. Badly fastened decorations fall down from towers and high buildings. In framework buildings, and especially in their partition walls, the dam­age to the plastering is great. Buildings that are badly built or out of repair suffer seriously in the same way; wooden fences, sheds, high enclosure walls, cottages and even churches, minarets of mosques, etc., in many country districts of southern Europe, fall down to a greater or less extent. Earthquake‑proof buildings, such as most of the stone and wooden houses in Japan, and the wood and wattled buildings, which are used in such great quantities in tropical earthquake districts, remain quite undamaged.

8 **Ruinous.** The trunks of trees, of palms especially, sway as with a strong wind. Even the heaviest pieces of furniture are shifted some distance or overturned. Statues, etc., near the ground, such as those in churches, churchyards, public parks, etc., either rotate on their pedestals or fall. Stone enclosure‑walls are split and thrown to the ground. Notwithstanding their solid construction, mid‑European houses suffer serious damage, with gaping cracks in the masonry; in some cases, they collapse partly; most chimneys fall; church towers and factory chimneys especially so suffer, and, by their fall, neighboring houses may be more seriously damaged as if by the action of the shock alone; exceptionally well‑built factory chimneys are only fractured and displaced in their upper portions. Earthquake‑proof buildings (such as those of Japan) show, slight damage, such as fractures, the crumbling of plaster, etc. (see degree 7, mid‑European houses), and wooden houses crack considerably in their joints. Rotten posts of Malayan stake‑huts break. Slight cracks in the ground near steep slopes and in damp soil; a few outflows of water carrying small quantities of sand or mud.

9 **Disastrous.** Solidly built houses of European construction are seriously damaged, so that a large number becomes uninhabitable, a few fall completely or nearly so. Framework buildings are displaced on their stone foundations, on account of which they are under certain conditions damaged. Earthquake‑proof buildings made of stone show considerable damage, the walls of wooden ones reveal gaps and cracks, old wooden houses are loosened in their frames.

10 **Destructive.** Most stone and framework buildings are over­thrown together with their foundations, even first‑class brick walls show dangerous cracks, but the percentage of those of mid‑European construction is larger than in the case of earthquake‑proof buildings. Even well‑built wooden houses and bridges suffer serious damage, a few are even demolished. Embankments, dams, etc., are more or less considerably damaged. Iron railway‑lines are slightly bent. Conduit pipes (gas, water, etc.) in the ground are rent or compressed. Fis­sures and undulating folds are formed in the asphalt of the streets. Loose, and especially damp, ground shows fissures up to several deci­meters in width; especially near water‑courses, there may be parallel fissures from one‑half to three‑quarters of a meter wide. Not only does loose ground slide down from cliffs as landslips, but also rock­slides fall into the valleys from the mountains, from the banks of rivers and even steep coasts whole parts break off, and on flat coasts masses of sand and mud are displaced, by which substantial changes in the form of the ground are wrought. The level of water springs is changed. From rivers, canals and lakes, water is thrown on to the banks.

11 **Catastrophe.** Stone buildings of whatever kind practically no longer stand. Even solid buildings of wood or wattling are only in a few cases able to survive, especially near lines of faulting. Bridge-­buildings, though large and securely constructed, are destroyed by the breaking off of massive stone piers or fracture of iron shafts. Yielding wooden floors, however, are sometimes less damaged. Embankments and dams are quite torn asunder, frequently for long distances. Iron rails are strongly bent and compressed. The kind and amount of damage to roads depends on the nature of the foundations. Conduit pipes in the ground are completely severed and rendered useless. The most varied and very considerable morphological changes of the ground are noticed, which are closely defined by the nature of the ground; wide fissures and cracks are formed, the derangements in the horizontal and vertical directions being specially important in soft and watery ground. There is also the appearance in various forms of water carrying sand and mud. Landslips and rocks‑falls are numerous.

12 **Great catastrophe.** No work of human hands remains stand­ing. The derangements and transformations of the ground attain the grandest dimensions. Even in rocky ground, faults of considerable depth are formed, with great horizontal movements and numerous fissures. Dock cliffs break, rock‑falls, landslips, collapse of river banks or shore are numerous and widespread. Underground and sur­face waters in consequence undergo the most various derangements; waterfalls are formed, lakes are dammed, rivers diverted, etc.

# THE MODIFIED MERCALLI (MM) INTENSITY SCALE

## 1956 version, from Richter (1958)

Definitions:

Masonry A: Good workmanship, mortar, and design; reinforced, especially laterally, and bound together by using steel, concrete, etc.; designed to resist lateral forces.

Masonry B: Good workmanship and mortar; reinforced, but not designed in detail to resist lateral forces.

Masonry C: Ordinary workmanship and mortar; no extreme weaknesses like failing to tie in at corners, but neither reinforced nor designed against horizontal forces.

Masonry D: Weak materials, such as adobe; poor mortar; low standards of workmanship; weak horizontally.

1 Not felt. Marginal and long period effects of large earthquakes.

2 Felt by persons at rest, on upper floors, or favourably placed.

3 Felt indoors. Hanging objects swing. Vibration like passing light trucks. Duration estimated. May not be recognised as an earthquake.

4 Hanging objects swing. Vibration like passing of heavy trucks; or sensation of a jolt like a heavy ball striking the walls. Standing motor cars rock. Windows, dishes, doors rattle.Glasses clink. Crockery clashes. In the upper range of 4, wooden walls and frame creak.

5 Felt outdoors; direction estimated. Sleepers wakened. Liquids disturbed, some spilled. Small unstable objects displaced or upset. Doors swing, close, open. Shutters, pictures move. Pendulum clocks stop, start, change rate.

6 Felt by all. Many frightened and run outdoors. Persons walk unsteadily. Windows, dishes, glassware broken. Knickknacks, books, etc., off shelves. Pictures off walls. Furniture moved or overturned. Weak plaster and masonry D cracked. Small bells ring (church, school). Trees, bushes shaken (visibly, or heard to rustle).

7 Difficult to stand. Noticed by drivers of motor cars. Hanging objects quiver. Furniture broken. Damage to masonry D, including cracks. Weak chimneys broken at roof line. Fall of plaster, loose bricks, stones, tiles, cornices (also unbraced parapets and architectural ornaments). Some cracks in masonry C. Waves on ponds; water turbid with mud. Small slides and caving in along sand or gravel banks. Large bells ring. Concrete irrigation ditches damaged.

8 Steering of motor cars affected. Damage to masonry C; partial collapse. Some damage to masonry B; none to masonry A. Fall of stucco and some masonry walls. Twisting, fall of chimneys, factory stacks, monuments, towers, elevated tanks. Frame houses moved on foundations if not bolted down; loose panel walls thrown out. Decayed piling broken off. Branches broken from trees. Changes in flow or temperature of springs and wells. Cracks in wet ground and on steep slopes.

9 General panic. Masonry D destroyed; masonry C heavily damaged, sometimes with complete collapse; masonry B seriously damaged. (General damage to foundations.) Frame structures, if not bolted, shifted off foundations. Frames racked. Serious damage to reservoirs. Underground pipes broken. Conspicuous cracks in ground. In alluvial areas sand and mud ejected, earthquake fountains, sand craters.

10 Most masonry and frame structures destroyed with their foundations. Some well-built wooden structures and bridges destroyed. Serious damage to dams, dikes, embankments. Large landslides. Water thrown on banks of canals, rivers, lakes, etc. Sand and mud shifted horizontally on beaches and flat land. Rails bent slightly.

11 Rails bent greatly. Underground pipelines completely out of service.

12 Damage nearly total. Large rock masses displaced. Lines of sight and level distorted. Objects thrown into the air.

# THE MEDVEDEV-SPONHEUER-KARNÍK (MSK) INTENSITY SCALE

## 1981 version, from Gerland’s Beiträge zur Geophysik, vol 90, pp 261-268

CLASSIFICATION OF THE SCALE

I Types of structures (buildings not antiseismic)

A: buildings of fieldstone, rural structures, adobe houses, clay houses;

B: ordinary brick buildings, large block construction, half-timbered structures, structures of hewn blocks of stone;

C: precast concrete skeleton construction, precast large panel construction, well-built wooden structures.

II Definition of Quantity

Single, few: < 10%

Many: 20 - 50%

Most: > 60%

III Classification of Damage to Buildings

Grade 1: Slight damage: Fine cracks in plaster; fall of small pieces of plaster.

Grade 2: Moderate damage: Small cracks in walls; fall of fairly large pieces of plaster; pantiles slip off; cracks in chimneys; parts of chimneys fall down.

Grade 3: Heavy damage: Large and deep cracks in walls; fall of chimneys.

Grade 4: Destruction: Gaps in walls; parts of buildings may collapse; separate parts of the buildings lose their cohesion; inner walls and filled-in walls of the frame collapse.

Grade 5: Total damage: Total collapse of buildings.

Arrangement of the Scale

a) Persons and surroundings

b) Structures

c) Nature

INTENSITY DEGREES

1 **Not noticeable**

a) The intensity of the vibration is below the limit of sensibility; the tremor is detected and recorded by seismographs only.

b) -

c) -

2 **Scarcely noticeable (very slight)**

a) Vibration is felt only by individual people at rest in houses, especially on upper floors of buildings.

b) -

c) -

3 **Weak**

a) The earthquake is felt indoors by a few people, outdoors only in favourable circumstances. The vibration is weak. Attentive observers notice a slight swinging of hanging objects, somewhat more heavily on upper floors.

b) -

c) -

4  **Largely observed**

a) The earthquake is felt indoors by many people, outdoors by few. Here and there people awake, but none is frightened. The vibration is moderate. Windows, doors and dishes rattle. Floors and walls creak. Furniture begins to shake. Hanging objects swing slightly. Liquids in open vessels are slightly disturbed. In standing motor cars the shock is noticeable.

b) -

c) -

5 **Strong**

a) The earthquake is felt indoors by most, outdoors by many. Many sleeping people awake. A few run outdoors. Animals become uneasy. Buildings tremble throughout. Hanging objects swing considerably. Pictures swing out of place. Occasionally pendulum clocks stop. Unstable objects may be overturned or shifted. Open doors and windows are thrust open and slam back again. Liquids spill in small amounts from well-filled open containers. The vibrations is strong, resembling sometimes the fall of a heavy object in the building.

b) Damage of grade 1 in few buildings of type A is possible.

c) Sometimes change in flow of springs.

6 **Slight damage**

a) Felt by most indoors and outdoors. Many people in buildings are frightened and run outdoors. A few persons lose their balance. Domestic animals run out of their stalls. In few instances dishes and glassware may break, books fall down. Heavy furniture may possibly move and small steeple bells may ring.

b) Damage of grade 1 is sustained in single buildings of type B and in many of type A. Damage in few buildings of type A is of grade 2.

c) In few cases cracks up to widths of 1 cm are possible in wet ground; in mountains occasional land-slips; changes in flow of springs and in level of well-water are observed.

9 **General damage to buildings**

a) General panic; considerable damage of furniture. Animals run to and fro in confusion and cry.

b) Many buildings of type C suffer damage of grade 3, a few of grade 4. Many buildings of type B show damage of grade 4, a few of grade 5. Many buildings of type A suffer damage of grade 5. Monuments and columns fall. Reservoirs may show heavy damage. In individual cases railway lines are bent and roadways damaged.

c) On flat land overflow of water, sand and mud is often observed. Ground cracks to widths of up to 10 cm, in slopes and river banks more than 10 cm; furthermore a large number of slight cracks in ground; falls of rock, many landslides and earth flows; large waves on water.

10 **General destruction of buildings**

b) Many buildings of type C suffer damage of grade 4, a few of grade 5. Many buildings of type B show damage of grade 5, most of type A collapse. Dams, dykes and bridges may show severe to critical damage. Railway lines are bent slightly. Road pavement and asphalt show waves.

c) In ground, cracks up to widths of several decimetres, sometimes up to 1 meter. Broad fissures occur parallel to water courses. Loose ground slides from steep slopes. Considerable landslides are possible from river banks and steep coast. In coastal areas displacement of sand and mud; water from canals, lakes, rivers etc. thrown on land. New lakes occur.

11 **Catastrophe**

b) Destruction of most and collapse of many buildings of type C. Even well built bridges and dams may be destroyed and railways lines largely bent, thrusted or buckled; highways become unusable; underground pipes destroyed.

c) Ground fractured considerably by broad cracks and fissures, as well as by movement in horizontal and vertical directions; numerous landslides and falls of rock. The intensity of the earthquake requires to be investigated specially.

12 **Landscape changes**

b) Practically all structures above and below ground are heavily damaged or destroyed.

c) The surface of the ground is radically changed. Considerable ground cracks with extensive vertical and horizontal movement are observed. Falls of rock and slumping of river banks over wide areas; lakes are dammed; waterfalls appear, and rivers are deflected. The intensity of the earthquake requires to be investigated specially.

# THE JAPANESE METEOROLOGICAL AGENCY (JMA) INTENSITY SCALE

## 1996 version, from JMA (1996), slightly edited by RMWM.

0

Effects on people: Imperceptible to people.

1

Effects on people: Felt by only some people indoors.

2

Effects on people: Felt by many people indoors. Some sleeping people awakened.

Indoors: Hanging objects such as lamps swing slightly.

3

Effects on people: Felt by most people indoors. Some people are frightened.

Indoors: Dishes in cupboards rattle occasionally.

Outdoors: Electric cables swing slightly.

4

Effects on people: Many people are frightened. Some people try to escape from danger. Most sleeping people are awakened.

Indoors: Hanging objects swing considerably and dishes in cupboards rattle. Unstable ornaments fall occasionally.

Outdoors: Electric cables swing considerably. People walking in the street and some people driving automobiles feel the tremor.

5 Lower

Effects on people: Most people try to escape from danger. Some people find it difficult to move.

Indoors: Hanging objects swing violently. Most unstable ornaments fall. Occasionally, dishes fall from cupboards, books fall off shelves and furniture moves.

Outdoors: People notice electric-light poles swaying. Occasionally, window panes are broken and fall, unreinforced concrete block walls collapse, and roads suffer damage.

Wooden houses: Occasionally, less earthquake-resistant houses suffer damage to walls and pillars.

Reinforced concrete buildings**:** Occasionally, cracks are formed in walls of less earthquake-resistant buildings.

Basic infrastructure**:** The gas supply at some houses is cut off by the safety device. On rare occasions water pipes are damaged and water supply is interrupted. Electrical supply is interrupted at some houses.

Ground and slopes:Occasionally, cracks appear in soft ground. Rock falls and small slope failures take place in mountainous districts.

5 Upper

Effects on people: Many people are very frightened and find it difficult to move.

Indoors: Most dishes fall from cupboards and most books fall from shelves. Occasionally, a TV set on a rack falls, heavy furniture such as a chest of drawers falls, sliding doors slip out of their groove, and the deformation of a door frame makes it impossible to open the door. Some doors get unhinged.

Outdoors: In many cases, unreinforced concrete block walls collapse and tombstones overturn. Many automobiles come to a stop because it becomes difficult to drive. Occasionally, poorly installed vending machines fall over.

Wooden houses: Occasionally, less earthquake-resistant houses suffer heavy damage to walls and pillars and lean to one side.

Reinforced concrete buildings**:** Occasionally, large cracks are formed in walls, crossbeams and pillars of less earthquake-resistant buildings, and even highly earthquake-resistant buildings develop cracks in walls.

Basic infrastructure**:** Occasionally, gas pipes and/or water mains are damaged. Occasionally, gas supply and/or water supply are interrupted in some regions.

Ground and slopes:Occasionally, cracks appear in soft ground. Rock falls and small slope failures take place in mountainous districts.

6 Lower

Effects on people: Difficult to keep standing.

Indoors: A lot of heavy and unbolted furniture moves and falls; it is impossible to open the door in many cases.

Outdoors: In many buildings, wall tiles and windowpanes are damaged and fall.

Wooden houses: Occasionally, less earthquake-resistant houses collapse and even walls and pillars of highly earthquake-resistant houses are damaged.

Reinforced concrete buildings**:** Occasionally, walls and pillars of less earthquake-resistant buildings are destroyed, and even highly earthquake-resistant buildings develop large cracks in walls, crossbeams and pillars.

Basic infrastructure**:** Gas pipes and/or water mains are damaged. In some regions, gas and water supplies are interrupted and electrical supply is interrupted occasionally.

Ground and slopes:Occasionally, cracks and slope failures take place in mountainous districts.

6 Upper

Effects on people: Impossible to keep standing, or to move other than by crawling.

Indoors: Most heavy and unbolted furniture moves and falls. Occasionally, sliding doors are thrown out of their grooves.

Outdoors: In many buildings, wall tiles and windowpanes are damaged and fall. Most unreinforced concrete block walls collapse.

Wooden houses: Many less earthquake-resistant houses collapse. In some cases, even walls and pillars of highly earthquake-resistant houses are heavily damaged.

Reinforced concrete buildings**:** Occasionally, less earthquake-resistant buildings collapse. In some cases, even highly earthquake-resistant buildings suffer damage to walls and pillars.

Basic infrastructure**:** Occasionally gas mains and/or water mains are damaged. Electrical service is interrupted in some regions. Occasionally, gas and/or water supplies are interrupted over a large area.

Ground and slopes:Occasionally, cracks and slope failures take place in mountainous districts.

7

Effects on people: People are thrown about by the shaking and it is impossible to move at will.

Indoors: Most furniture moves to a large extent and some jumps up.

Outdoors: In most buildings, wall tiles and windowpanes are damaged and fall. In some cases, reinforced concrete block walls collapse.

Wooden houses: Occasionally, even highly earthquake-resistant houses are severely damaged and lean to one side.

Reinforced concrete buildings**:** Occasionally, even highly earthquake-resistant buildings are severely damaged and lean to one side.

Basic infrastructure: Electrical, gas, and water supplies are interrupted over a large area.

Ground and slopes: The ground is considerably distorted by large cracks and fissures, and slope failures and landslides take place, which occasionally change local topographic features.

# THE EUROPEAN MACROSEISMIC SCALE-98 (EMS-98) INTENSITY SCALE

## 1998 version, from Grünthal (1998). The core part (pp 14-20) of the scale is reproduced here.
